# Supplementary material for: Notoginsenoside R1 Ameliorates Diabetic Retinopathy through PINK1-Dependent Activation of Mitophagy
Source: PubMed Central journal article supplement (PMC6468581; doi:10.3390/cells8030213), 2019-03-02
Supplement: cells-08-00213-s001.pdf [file cells-08-00213-s001.pdf]

## Supplementary materials

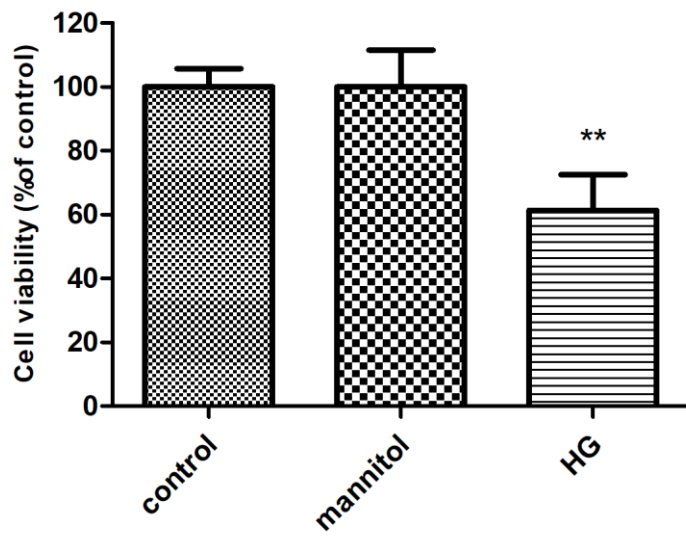

Figure S1. 60mM HG preconditioning exerted no osmotic toxicity on rMC-1 cells
